# Supplementary material for: Characterization of an Aedes ADP-Ribosylation Protein Domain and Role of Post-Translational Modification during Chikungunya Virus Infection
Source: MDPI journal article supplement (doi:10.3390/pathogens12050718), 2023-05-16
Supplement: s1 [file s1]

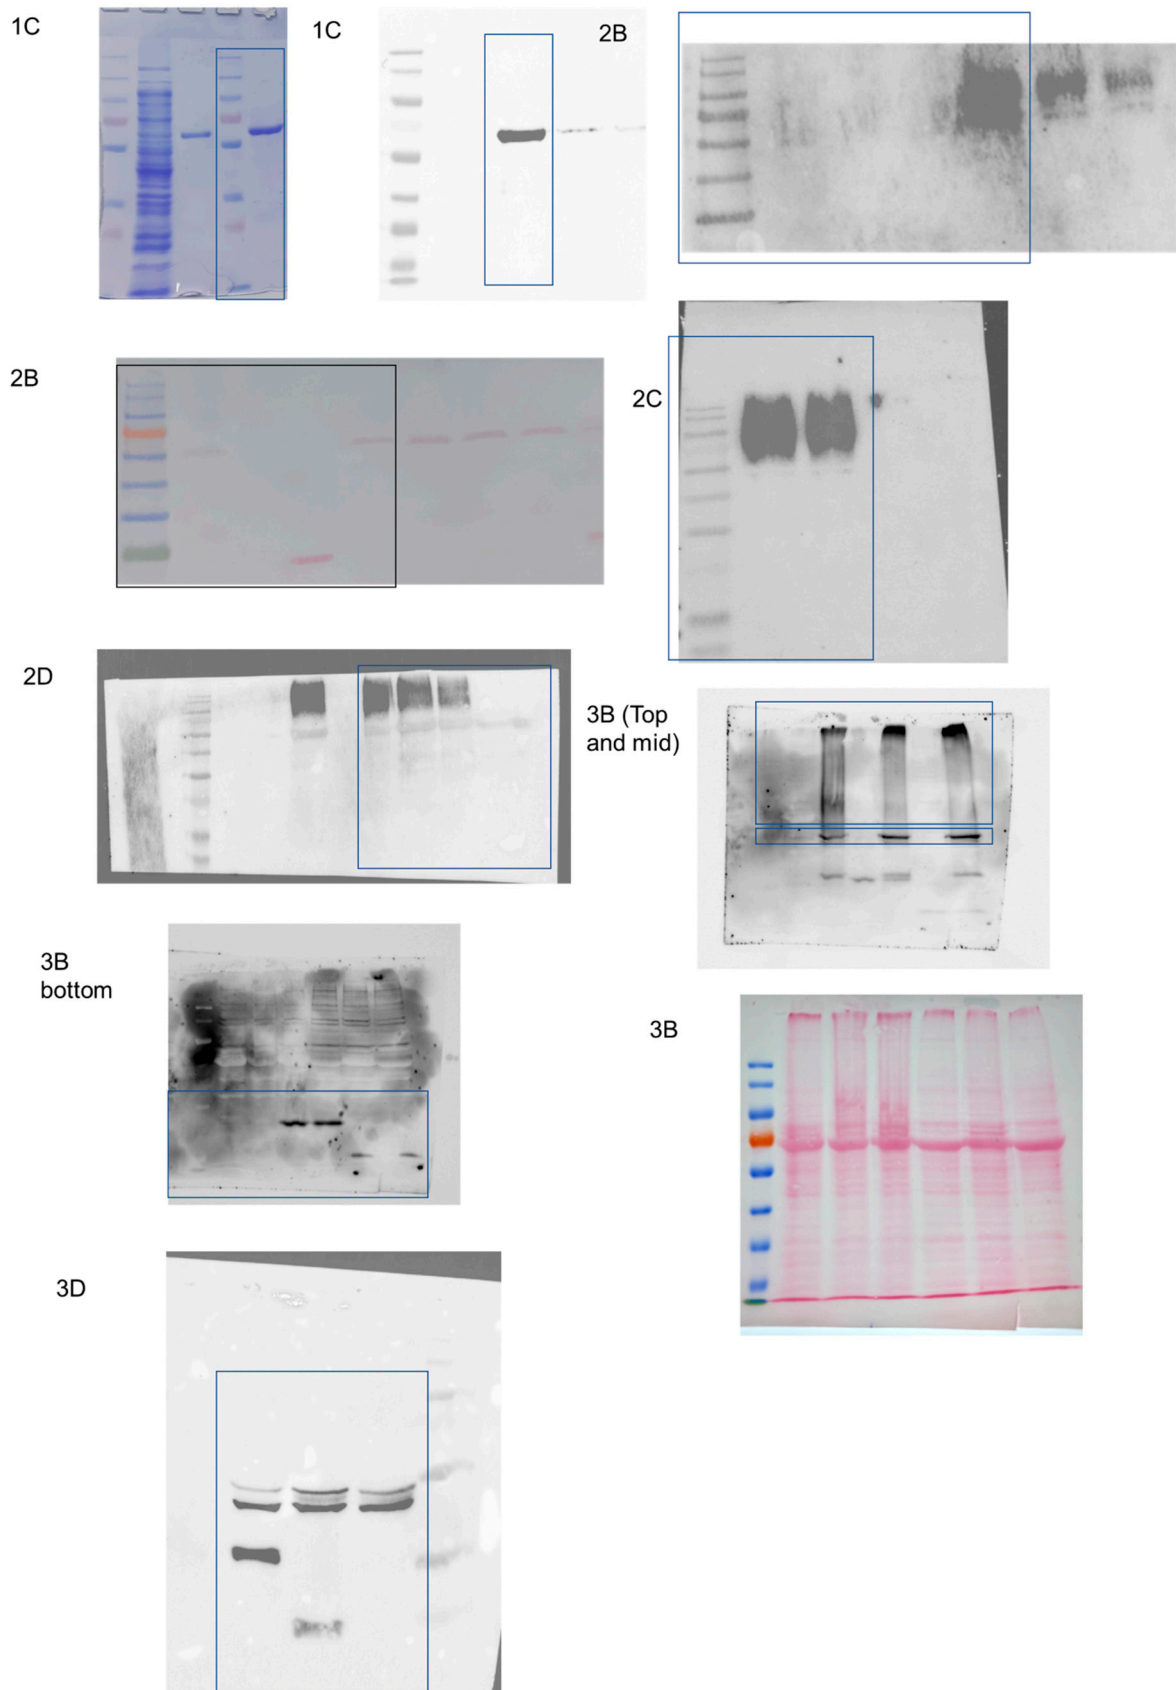

**Figure S1** Uncropped images of SDS-PAGE gel, ponceau stained and chemiluminescent substrate exposed membranes used in the study. Number mentioned are figures where these are used the manuscript.

|           |                                                                         |      |
|-----------|-------------------------------------------------------------------------|------|
| Tankyrase | MSSSAGHHLASTIQQHQQQQSSSGSASLSSASNPTRSMLSVNLEAAAMANDPLRDLF               | 60   |
| PARP5b    | -----MSGRRCAGGGA-----ACASAAAEAVEPAARELF                                 | 29   |
|           | :  .:  .:  *                  *  *  .:  *  **                           |      |
| Tankyrase | EACKTGDLVKVKLITSQTVNARDTAGRKSTPLHFAAGYGRDVEFLLTNGASIQARDD               | 120  |
| PARP5b    | EACRNGDVERVKRLVTPEKVNSTRDAGRKSTPLHFAAGFGRKDVVEYLLQNGANVQARDD            | 89   |
|           | **  *  *  *  *  *  *  *  *  *  *  *  *  *  *  *  *  *  *  *  *  *  *  * |      |
| Tankyrase | GGLHPLHNACSFHADVVRLLEAGANPNTRDNWNYTPLHEAASKGKVDVCIALLQHGAD              | 180  |
| PARP5b    | GGLIPLHNACSFHAEVNNLLLRHGADPNARDNWNITPLHEAAIKGKIDVCIVLLQHGAE             | 149  |
|           | **  *  *  *  *  *  *  *  *  *  *  *  *  *  *  *  *  *  *  *  *  *  *    |      |
| Tankyrase | PNIRNSENKIPLDLADPCTRPVLGTGEYRKDELLEAARSSEERLLELLTPLNVNCHASDG            | 240  |
| PARP5b    | PTIRNTDGR TALDLADPSAKAVLTGEYKDELLESARSGNEEKMMALLTPLNVNCHASDG            | 209  |
|           | *  *  *  *  *  *  *  *  *  *  *  *  *  *  *  *  *  *  *  *  *  *  *     |      |
| Tankyrase | RKSTPLHLAAGYNIRVQILLQHGADVHAKDKGGLVPLHNACSYGHFEVTELLIKHGGN              | 300  |
| PARP5b    | RKSTPLHLAAGYNIRVQILLQHGADVHAKDKGGLVPLHNACSYGHFEVTELLIKHGGN              | 269  |
|           | *****  *  *  *  *  *  *  *  *  *  *  *  *  *  *  *  *  *  *  *          |      |
| Tankyrase | VNANDLWAFPLHEAASKRVEVCSLLLAEGADPTLLNCHNKSAIDSAPTRELQEKITYE              | 360  |
| PARP5b    | VNANDLWQFTPLHEAASKRVEVCSLLLSYGADPTLLNCHNKSAIDLAPTQLKERLAYE              | 329  |
|           | **  *  *  *  *  *  *  *  *  *  *  *  *  *  *  *  *  *  *  *  *  *       |      |
| Tankyrase | YKGHCVLDAQRQADMRKKNLTETVNFHPYSGDTPHVAQSVYPRKQVLEVLIRK                   | 420  |
| PARP5b    | FKGHSLLQAAREADVTRIKKHSLEWVNFHPQTHETALHCAASYPYKQICELLRLK                 | 389  |
|           | ..**  *  *  *  *  *  *  *  *  *  *  *  *  *  *  *  *  *  *  *           |      |
| Tankyrase | GALLNEKNKDFLTPHIAADNSHYEIMDVLLRHGAKVDSLDGLQTALHRCAREDNQAC               | 480  |
| PARP5b    | GANINEKTEFLTPHVAEKANDVVEVVKHEAKVNDNLGQSLHRAAYCGLQTC                     | 449  |
|           | **  *  *  *  *  *  *  *  *  *  *  *  *  *  *  *  *  *  *  *  *  *       |      |
| Tankyrase | RLLSYNIIDTSIVSLQGYTAAQLATENVKILQDPPS-DTVDELCQLLEAAKAGDLDTVR             | 539  |
| PARP5b    | RLLSYGDNPNIISLQGFALQMGNEVQQLQEGISLGNSEADRQLLEAAKAGDVEVTK                | 509  |
|           | *****  *  *  *  *  *  *  *  *  *  *  *  *  *  *  *  *  *  *  *          |      |
| Tankyrase | RIVLSNPMTVNCRDLGRHSTPLHFAAGYNRPVVEFLLEHGAEVHASDKGGLVPLHNAC              | 599  |
| PARP5b    | KLC--TVQSVNCRDIEGRQSTPLHFAAGYNRPVVEYLLQHGADVHAKDKGGLVPLHNAC             | 567  |
|           | :  *  *  *  *  *  *  *  *  *  *  *  *  *  *  *  *  *  *  *              |      |
| Tankyrase | SYGHEVTELLVKHGANVNVADLWKFTPLHEAAAKGYEIVKLLIKHADVTKKNRDGT                | 659  |
| PARP5b    | SYGHEVAELLVKHGAENVNVADLWKFTPLHEAAAKGYEICKLLQHGADPTKKNRDGT               | 627  |
|           | *****  *  *  *  *  *  *  *  *  *  *  *  *  *  *  *  *  *  *  *          |      |
| Tankyrase | PLDLVREGDQDVADLLRGNAALLDAAKGNLARVQRLVTPDNINCRDAQGRNSTPLHLAA             | 719  |
| PARP5b    | PLDLVKDGDIDQDLRGDAALLDAAKGCCLARVKKLSSPDNINCRDTQGRHSTPLHLAA              | 687  |
|           | *****  *  *  *  *  *  *  *  *  *  *  *  *  *  *  *  *  *  *  *          |      |
| Tankyrase | GYNNLEVAEYLLHAGADVNAQDKGGLIPLHNASSYGHLDIAALLIKHNTVNVATDKWGYT            | 779  |
| PARP5b    | GYNNLEVAEYLLQHGADVNAQDKGGLIPLHNASSYGHVDAALLIKYNACVNVATDKWGYT            | 747  |
|           | *****  *  *  *  *  *  *  *  *  *  *  *  *  *  *  *  *  *  *  *          |      |
| Tankyrase | PLHEAAQKGRQQLCSLLLAHGADPFMKNQEGQTSLDLATAEDVKCLLDQAMVASQASTTA            | 839  |
| PARP5b    | PLHEAAQKGRQQLCALLLAHGADPTLKNQEGQTPDLVSADDSALLTAAMPSPALPSCY              | 807  |
|           | *****  *  *  *  *  *  *  *  *  *  *  *  *  *  *  *  *  *  *  *          |      |
| Tankyrase | NGSGTSMANSSLMATTCSPPTTETVLTPTGASMTLSVPVPQPLIRSCLSPAQGAETNVDG            | 899  |
| PARP5b    | KPQ-----VLNGVRSFGATADALSSGSPSS-----LSAASSLDNLSSGFSSELSS                 | 853  |
|           | :  *  *  *  *  *  *  *  *  *  *  *  *  *  *  *  *  *  *  *              |      |
| Tankyrase | VVL-----DDKMSQVVAIESSVSFAFSLQLEHLIELLEREQITMDILAEMGHEDLK                | 952  |
| PARP5b    | VVSSSGTEGASSLEKKEVPGVDFSIQFVRNLGLEHLMIDIFEREQITLDVLVEMGHKELK            | 913  |
|           | **  *  *  *  *  *  *  *  *  *  *  *  *  *  *  *  *  *  *  *             |      |
| Tankyrase | QVGVSAYGFRHKILKGIATLRATT-GLG----LTPNPGTLLVDLLPDDKEFLAVEEEMQ             | 1006 |
| PARP5b    | EIGINAYGHRHKLIGVERLISGQGLNPYLTNTSGSGTILIDLSPODKFQSVVEEEMQ               | 973  |
|           | :  *  *  *  *  *  *  *  *  *  *  *  *  *  *  *  *  *  *  *              |      |
| Tankyrase | ATIREHRDNGHGGYFTRYINVRQVQNRKLWERYVHRRKEISEENGHQASERMLFHGS               | 1066 |
| PARP5b    | STVREHRDGGHGGIFNRYNLIKIQKC-NKKLWERYTHRRKEVSEENHNHANERMLFHGS             | 1032 |
|           | :  *  *  *  *  *  *  *  *  *  *  *  *  *  *  *  *  *  *  *              |      |
| Tankyrase | PFINAIQKGFDERHAYIGGMFAGIYFAEHSSKSNQVYVYIGGGIGCPAHKDKSCYQCH              | 1126 |
| PARP5b    | PFVNAIHKGFDERHAYIGGMFAGIYFAENSSKSNQVYVYIGGGIGCPVHKDRSCYICH              | 1092 |
|           | **  *  *  *  *  *  *  *  *  *  *  *  *  *  *  *  *  *  *  *             |      |
| Tankyrase | RQLLCRVALGKSLQFSAMKMAHAPPGHHSVIGRPSAGGLHPEYVYVYRGEQAYPEYLI              | 1186 |
| PARP5b    | RQLLCRVTLGKSLQFSAMKMAHSPGHHSVIGRPSVNLALAEVYVYRGEQAYPEYLI                | 1152 |
|           | ***  *  *  *  *  *  *  *  *  *  *  *  *  *  *  *  *  *  *  *            |      |
| Tankyrase | TYQIVKPDSDASQPQEPAR                                                     | 1204 |
| PARP5b    | TYQIMRPEGMVDG----                                                       | 1165 |
|           | ***  *  *  *  *  *  *  *  *  *  *  *  *  *  *  *  *  *  *  *            |      |

**Figure S2** Sequence alignment of *Ae. aegypti* Tankyrase proteins and human PARP5b protein. The domains of *Ae. aegypti* Tankyrase were shown in coloured boxes. ■-Ankyrin repeats, ■-SAM domain, and ■-PARP catalytic domain. Asterisk (\*) indicates fully conserved residue, colon (:) indicates conservation between groups of strongly similar properties, and period (.) indicates conservation between groups of weakly similar properties.







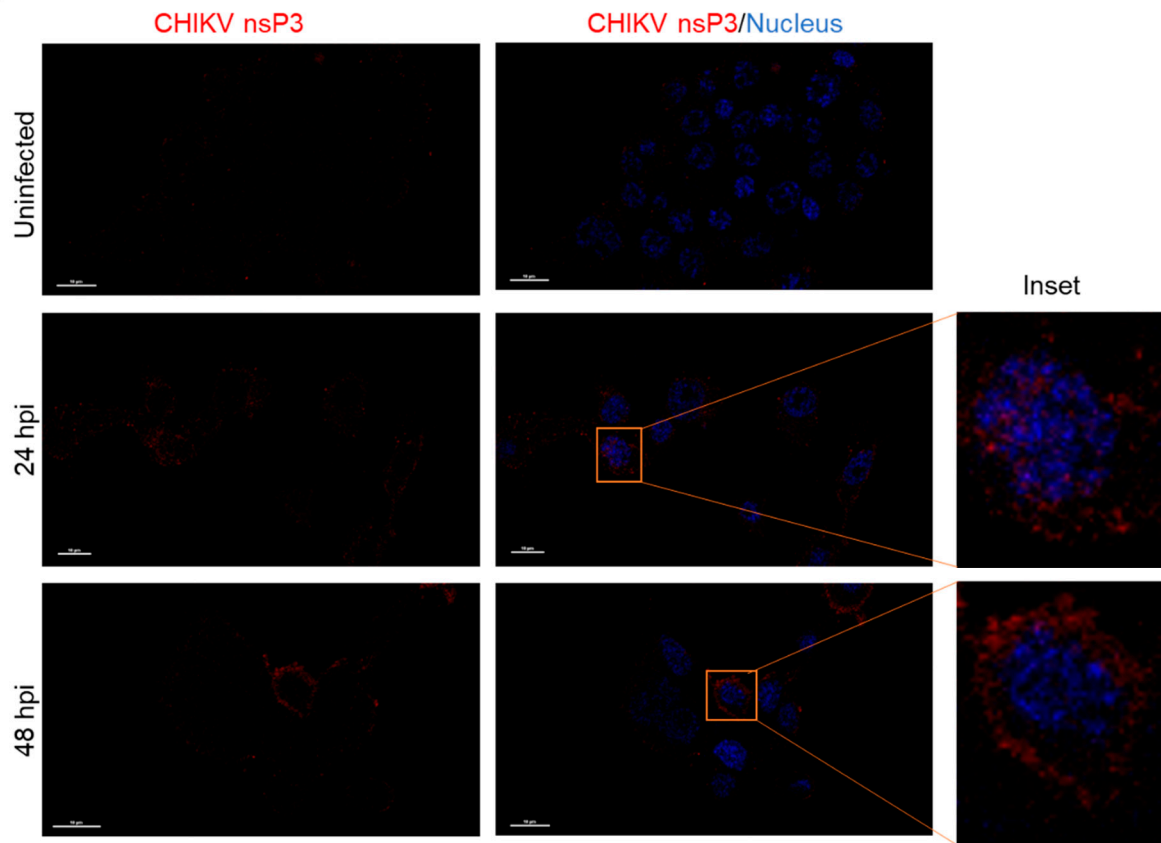

**Figure S6** Immunofluorescence assay of CHIKV infected Aag2 cells. Aag2 cells were infected with CHIKV at MOI of 1 and fixed at 24 hpi and 48 hpi as well as uninfected cells. The cells were then incubated with anti-CHIKV nsP3 mice sera, followed by Alexa 594 anti-mouse IgG antibody. The nucleus was stained with DAPI. Cells were visualized in confocal microscope at 100X with oil immersion. The insets represent magnification of selected zones. Bar length=10  $\mu$ m.
